# Supplementary material for: Smart sensing of Cu2+ in living cells by water-soluble and nontoxic Tb3+/Eu3+-induced aggregates of polysaccharides through fluorescence imaging
Source: Royal Society of Chemistry journal article supplement (doi:10.1039/d0tc00076k), 2020-01-01

## Supporting information for:

# Smart Sensing to Cu<sup>2+</sup> in Living Cell by Water-Soluble and Nontoxic Tb<sup>3+</sup>/Eu<sup>3+</sup>-Induced Aggregates of Polysaccharides through Fluorescence Imaging

Jing Wang<sup>85</sup><sup>1</sup>, Jin Liu<sup>1</sup>, Jing Wang<sup>95</sup><sup>1</sup>, Yao Wang<sup>1</sup>, Jie Cao<sup>2</sup>, Lin Hou<sup>3</sup>, Ruifen Ge<sup>2</sup>, Jinnan Chi<sup>2</sup>,  
Linjun Huang<sup>1</sup>, Junlan Guo<sup>1</sup>, Abdur Raheem Aleem<sup>1</sup>, Zhengxing Song<sup>1</sup>, Shree Krishna Tamang<sup>1</sup>,  
Jixian Liu<sup>1</sup>, Guanghui Wang<sup>1</sup>, Matt J. Kipper<sup>4,\*</sup>, Laurence A. Belfiore<sup>1,4\*</sup>, Jianguo Tang<sup>1,\*</sup>

<sup>1</sup>*Institute of Hybrid Materials, National Center of International Joint Research for Hybrid Materials Technology,  
National Base of International Sci. & Tech. Cooperation on Hybrid Materials, Qingdao University, 308 Ningxia  
Road, Qingdao 266071, P. R. China*

<sup>2</sup>*Department of Pharmaceutics, School of Pharmacy, Qingdao University, 38 Dengzhou Road, Qingdao 266021,  
P. R. China*

<sup>3</sup>*Biochemistry and Molecular Biology Department, School of Medicine, Qingdao University, 308 Ningxia Road,  
Qingdao 266071, P. R. China*

<sup>4</sup>*Department of Chemical and Biological Engineering, Colorado State University, Fort Collins, Colorado 80523,  
USA*

\* Corresponding author: Jianguo Tang ([tang@qdu.edu.cn](mailto:tang@qdu.edu.cn))

Tel.: +86 532 85951519 Fax: +86 532 85951519

Matt J. Kipper ([Matthew.Kipper@ColoState.EDU](mailto:Matthew.Kipper@ColoState.EDU))

Tel.: +01 970 491-0870 Fax: +1 970 4917369

Laurence A. Belfiore ([belfiore@engr.colostate.edu](mailto:belfiore@engr.colostate.edu))

Tel.: +01 970 4915395 Fax: +01 970 4915395

FTIR spectra and NMR spectra of the chitosan, hyaluronan, heparin, chi-hep, and chi-hya are shown in Figure S.1 and Figure S.2.

Fig. S.1. FTIR spectra of (a) chitosan, (b) hyaluronan, (c) chi-hya, (d) heparin and (e) chi-hep.

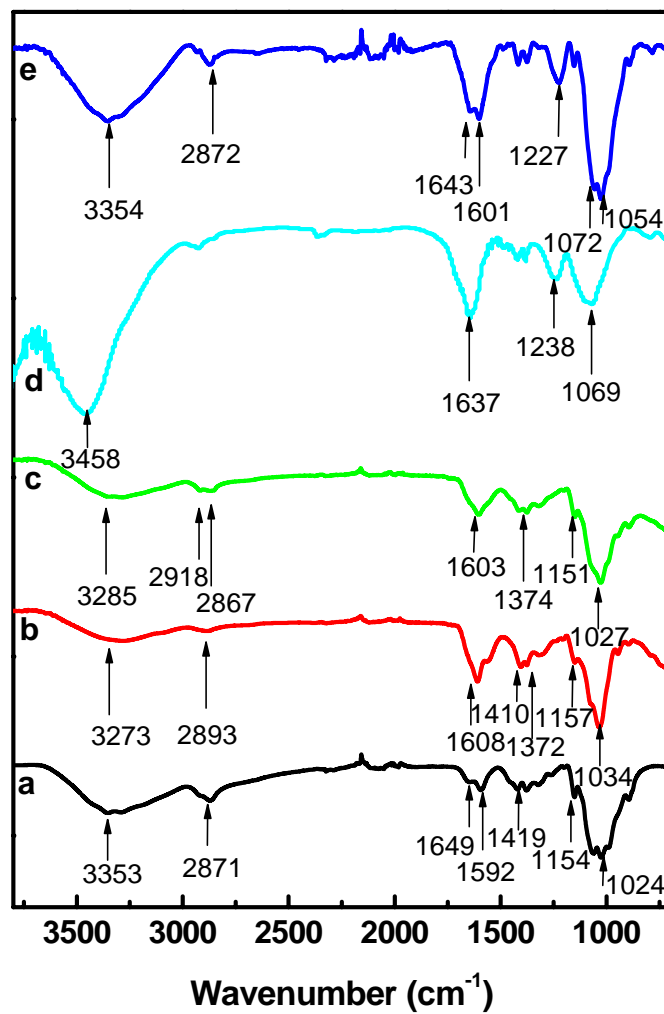

Fig. S.2.  $^1\text{H}$ -NMR spectra of (a) chitosan, (b) heparin, (c) hyaluronan, (d) chi-hep and (e) chi-hya.

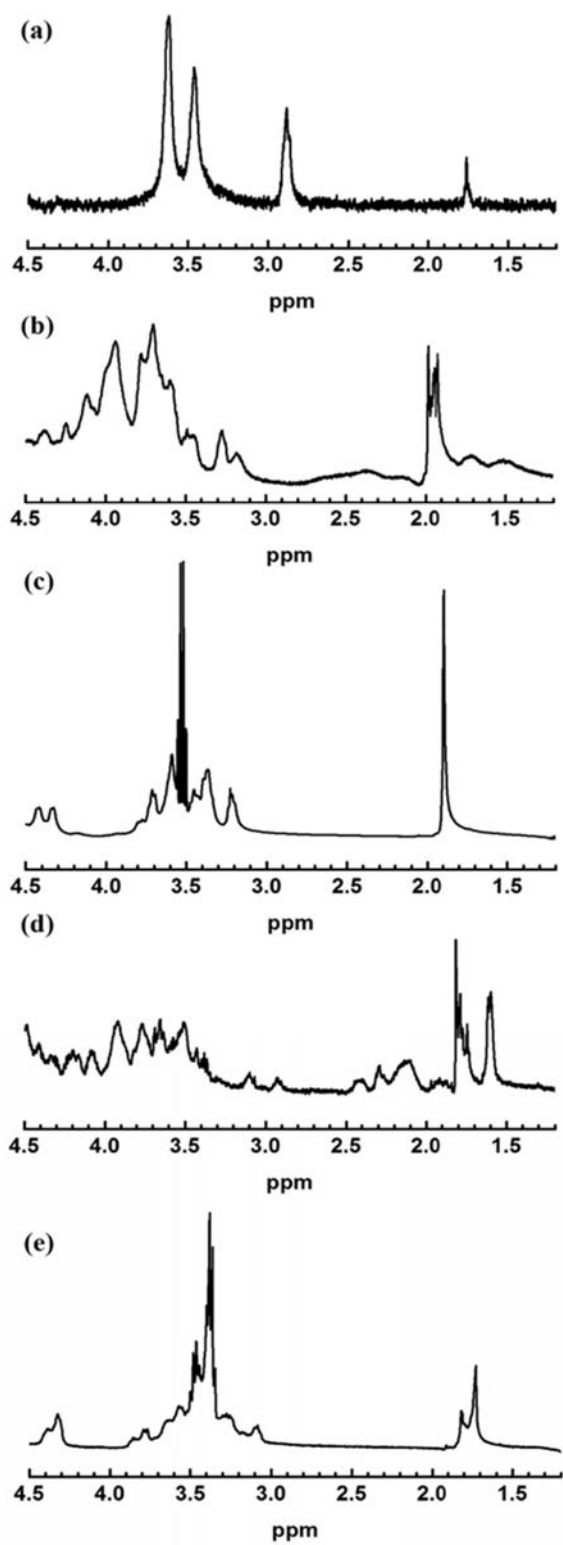

Supplement: d0tc00076k1.pdf [file d0tc00076k1.pdf]
